# Supplementary material
Source: PubMed Central journal article supplement (PMC2981305)
Supplement: supp_78_12_5178__1.pdf [file supp_78_12_5178__1.pdf]

**Suppl. Table 1. Outputs of computational programs for identification of candidate OMPs.**

# Filtered by non-Outer Membrane protein Orthologs

● Filtered by lipoprotein filter

◆ Filtered by transmembrane  $\alpha$ -helix Filter

**CELLO**

|         |                                                   |
|---------|---------------------------------------------------|
| TP0011  | Tpr protein B (TprB)                              |
| TP0117  | Tpr protein C (TprC)                              |
| TP0131  | Tpr protein D (TprD)                              |
| TP0155  | Conserved hypothetical protein                    |
| TP0257# | Glycerophosphoryldiester phosphodiesterase (glpQ) |
| TP0292  | Tpn50                                             |
| TP0313  | Tpr protein E (TprE)                              |
| TP0325  | Conserved hypothetical protein                    |
| TP0326  | BamA ortholog                                     |
| TP0421  | Conserved hypothetical protein                    |
| TP0424# | V-type ATPase, subunit E, putative                |
| TP0453● | Hypothetical protein                              |
| TP0483  | Hypothetical protein                              |
| TP0498# | Rod shape-determining protein (mreC)              |
| TP0515  | Conserved hypothetical protein                    |
| TP0548  | Hypothetical protein                              |
| TP0571◆ | Tp70                                              |
| TP0574# | Carboxypeptidase,                                 |
| TP0598  | Hypothetical protein                              |
| TP0620  | Tpr protein I (TprI)                              |
| TP0621  | Tpr protein J (TprJ)                              |
| TP0659# | Flagellar hook-associated protein 3 (flgL)        |
| TP0698  | Hypothetical protein                              |
| TP0724# | Flagellar motor rotation protein (motB)           |
| TP0729  | Hypothetical protein                              |

|         |                                             |
|---------|---------------------------------------------|
| TP0747  | Hypothetical protein                        |
| TP0773# | Periplasmic serine protease DO (htrA-1)     |
| TP0841# | Periplasmic serine protease DO (htrA-2)     |
| TP0855  | Hypothetical protein                        |
| TP0856  | Hypothetical protein                        |
| TP0858  | Hypothetical protein                        |
| TP0864◆ | Conserved hypothetical protein              |
| TP0865  | Hypothetical protein                        |
| TP0872# | Flagellar filament cap protein (fliD)       |
| TP0897  | Tpr protein K (TprK)                        |
| TP0923  | Hypothetical protein                        |
| TP0969  | Hypothetical protein                        |
| TP0990◆ | Conserved hypothetical protein              |
| TP0996  | Conserved hypothetical protein              |
| TP0997# | Protease IV (sppA)                          |
| TP1020# | Glu-tRNA amidotransferase, subunit A (gatA) |
| TP1031  | Tpr protein L (TprL)                        |

**PSORT**

|         |                                                   |
|---------|---------------------------------------------------|
| TP0049  | Conserved hypothetical protein                    |
| TP0155  | Conserved hypothetical protein                    |
| TP0257# | Glycerophosphoryldiester phosphodiesterase (glpQ) |
| TP0292  | Tpn50                                             |
| TP0326  | BamA ortholog                                     |
| TP0421  | Conserved hypothetical protein                    |
| TP0444◆ | Conserved hypothetical protein                    |
| TP0571◆ | Tp70                                              |
| TP0621  | Tpr protein J (TprJ)                              |
| TP0706  | Conserved hypothetical protein                    |
| TP0729  | Hypothetical protein                              |
| TP0769  | TmpB                                              |
| TP0855  | Hypothetical protein                              |
| TP0864◆ | Conserved hypothetical protein                    |

TP0865 Hypothetical protein  
TP0969 Hypothetical protein  
TP0990♦ Conserved hypothetical protein

**TMBETADISC (PSSM Profiles)**

TP0011 Tpr protein B (TprB)  
TP0040# Methyl-accepting chemotaxis protein (mcp1)  
TP0042♦ Hypothetical protein  
TP0062# Single-strand DNA binding protein (ssb)  
TP0095 Hypothetical protein  
TP0114# Lambda CII stability-governing protein (hfIC)  
TP0117 Tpr protein D (TprD)  
TP0118 Hypothetical protein  
TP0131 Tpr protein D (TprD)  
TP0133● Hypothetical protein  
TP0134 Hypothetical protein  
TP0155 Conserved hypothetical protein  
TP0171● Lipoprotein  
TP0247# N-acetylmuramoyl-L-alanine amidase (amiA)  
TP0261# Catabolite gene activator, putative  
TP0263# Carboxyl-terminal protease (ctp)  
TP0277# Carboxyl-terminal protease (ctp)  
TP0282 Hypothetical protein  
TP0313 Tpr protein E (TprE)  
TP0317 Tpr protein G (TprG)  
TP0319● Lipoprotein  
TP0324 Hypothetical protein  
TP0326 BamA ortholog  
TP0363# Chemotaxis histidine kinase (cheA)  
TP0399# Chemotaxis histidine kinase (cheA)  
TP0421 Conserved hypothetical protein  
TP0463 Hypothetical protein  
TP0481♦ Hypothetical protein

|         |                                                                                   |
|---------|-----------------------------------------------------------------------------------|
| TP0482  | Hypothetical protein                                                              |
| TP0486● | Antigen p83/100                                                                   |
| TP0487  | Hypothetical protein                                                              |
| TP0488# | Methyl-accepting chemotaxis protein (mcp2-1)                                      |
| TP0496  | Conserved hypothetical protein                                                    |
| TP0498# | Rod shape-determining protein (mreC)                                              |
| TP0544  | Hypothetical protein                                                              |
| TP0546# | Periplasmic serine protease, putative                                             |
| TP0548  | Hypothetical protein                                                              |
| TP0571♦ | Tp70                                                                              |
| TP0574# | Carboxypeptidase,                                                                 |
| TP0620  | Tpr protein I (TprI)                                                              |
| TP0621  | Tpr protein J (TprJ)                                                              |
| TP0623# | Membrane-bound lytic murein transglycosylase D                                    |
| TP0639# | Methyl-accepting chemotaxis protein (mcp2-2)                                      |
| TP0640# | Methyl-accepting chemotaxis protein (mcp2-3)                                      |
| TP0659# | Flagellar hook-associated protein 3 (flgL)                                        |
| TP0660# | Flagellar hook-associated protein 3 (flgL)                                        |
| TP0674  | Hypothetical protein                                                              |
| TP0684# | Flagellar hook-associated protein                                                 |
| TP0705# | Methylgalactoside ABC transporter, periplasmic galactose-binding protein (mgIB-2) |
| TP0724# | Penicillin-binding protein (pbp-2)                                                |
| TP0727# | Flagellar motor rotation protein (motB)                                           |
| TP0728# | Flagellar hook protein (flgE)                                                     |
| TP0729  | Hypothetical protein                                                              |
| TP0737# | Sugar ABC transporter, periplasmic binding protein                                |
| TP0739  | Conserved hypothetical protein                                                    |
| TP0760# | Penicillin-binding protein (pbp-3)                                                |
| TP0768● | TmpA                                                                              |
| TP0773# | Periplasmic serine protease DO (htrA-1)                                           |
| TP0782  | Hypothetical protein                                                              |

Suppl. Table

|         |                                                 |
|---------|-------------------------------------------------|
| TP0792# | Flagellar filament 33 kDa core protein (flaB2)  |
| TP0820  | Hypothetical protein                            |
| TP0829  | Conserved hypothetical protein                  |
| TP0841# | Periplasmic serine protease DO (htrA-2)         |
| TP0855  | Hypothetical protein                            |
| TP0857  | Hypothetical protein                            |
| TP0858  | Hypothetical protein                            |
| TP0860  | Hypothetical protein                            |
| TP0862# | Peptidyl-prolyl cis-trans isomerase, FKBP-type, |
| TP0865  | Hypothetical protein                            |
| TP0872# | Flagellar filament cap protein (fliD)           |
| TP0897  | Tpr protein K (TprK)                            |
| TP0928  | Hypothetical protein                            |
| TP0959  | Hypothetical protein                            |
| TP0960# | Flagellar basal-body rod protein (flgG-1)       |
| TP0961# | Flagellar filament cap protein (fliD)           |
| TP0965  | Membrane fusion protein                         |
| TP0966  | Hypothetical protein                            |
| TP0967  | Hypothetical protein                            |
| TP0968  | Hypothetical protein                            |
| TP0969  | Hypothetical protein                            |
| TP0992  | Conserved hypothetical protein                  |
| TP0997# | Protease IV (sppA)                              |
| TP1005# | Flagellar basal-body rod protein (flgG-1)       |
| TP1014  | Hypothetical protein                            |
| TP1016  | Basic membrane protein                          |
| TP1031  | Tpr protein L (TprL)                            |

**TMBETADISC (Amino acid composition)**

|         |                                         |
|---------|-----------------------------------------|
| TP0042◆ | Hypothetical protein                    |
| TP0062# | Single-strand DNA binding protein (ssb) |
| TP0095  | Hypothetical protein                    |
| TP0098# | Heat-shock protein, putative            |

Suppl. Table

|         |                                            |
|---------|--------------------------------------------|
| TP0099# | Uridylate kinase (smbA)                    |
| TP0117  | Tpr protein D (TprD)                       |
| TP0118  | Hypothetical protein                       |
| TP0131  | Tpr protein D (TprD)                       |
| TP0134  | Hypothetical protein                       |
| TP0155  | Conserved hypothetical protein             |
| TP0171● | Lipoprotein                                |
| TP0190# | Ribosomal protein L4 (rplD)                |
| TP0220# | Anti-sigma F factor antagonist (spolIIA-1) |
| TP0271# | Chromosome partitioning protein (parB)     |
| TP0282  | Hypothetical protein                       |
| TP0325  | Conserved hypothetical protein             |
| TP0326  | BamA ortholog                              |
| TP0334◆ | Conserved hypothetical protein             |
| TP0352  | Hypothetical protein                       |
| TP0363# | Chemotaxis histidine kinase (cheA)         |
| TP0376  | Hypothetical protein                       |
| TP0453● | Hypothetical protein                       |
| TP0468  | Conserved hypothetical protein             |
| TP0469  | Conserved hypothetical protein             |
| TP0474  | Conserved hypothetical protein             |
| TP0482  | Hypothetical protein                       |
| TP0486● | Antigen p83/100                            |
| TP0487  | Hypothetical protein                       |
| TP0571◆ | Tp70                                       |
| TP0574# | Carboxypeptidase,                          |
| TP0597  | Hypothetical protein                       |
| TP0620  | Tpr protein I (TprI)                       |
| TP0621  | Tpr protein J (TprJ)                       |
| TP0622● | Hypothetical protein                       |
| TP0648  | Conserved hypothetical protein             |
| TP0659# | Flagellar hook-associated protein 3 (flgL) |
| TP0660# | Flagellar hook-associated protein          |

Suppl. Table

|         |                                                                                   |
|---------|-----------------------------------------------------------------------------------|
| TP0674  | Hypothetical protein                                                              |
| TP0684# | Methylgalactoside ABC transporter, periplasmic galactose-binding protein (mgIB-2) |
| TP0698  | Hypothetical protein                                                              |
| TP0700  | Hypothetical protein                                                              |
| TP0705# | Penicillin-binding protein (pbp-2)                                                |
| TP0710  | Conserved hypothetical protein                                                    |
| TP0722# | Flagellar protein (fliL)                                                          |
| TP0724# | Flagellar motor rotation protein (motB)                                           |
| TP0727# | Flagellar hook protein (flgE)                                                     |
| TP0729  | Hypothetical protein                                                              |
| TP0739  | Conserved hypothetical protein                                                    |
| TP0747  | Hypothetical protein                                                              |
| TP0768● | TmpA                                                                              |
| TP0773# | Periplasmic serine protease DO (htrA-1)                                           |
| TP0841# | Periplasmic serine protease DO (htrA-2)                                           |
| TP0844# | Glyceraldehyde 3-phosphate dehydrogenase (gap)                                    |
| TP0848# | Ribosomal protein L20 (rplT)                                                      |
| TP0855  | Hypothetical protein                                                              |
| TP0857  | Hypothetical protein                                                              |
| TP0864♦ | Conserved hypothetical protein                                                    |
| TP0865  | Hypothetical protein                                                              |
| TP0872# | Flagellar filament cap protein (fliD)                                             |
| TP0905# | Ribosomal protein S16 (rpsP)                                                      |
| TP0928  | Hypothetical protein                                                              |
| TP0954● | Conserved hypothetical protein                                                    |
| TP0959  | Hypothetical protein                                                              |
| TP0960# | Flagellar basal-body rod protein (flgG-1)                                         |
| TP0967  | Hypothetical protein                                                              |
| TP0969  | Hypothetical protein                                                              |
| TP0992  | Conserved hypothetical protein                                                    |
| TP0997# | Protease IV (sppA)                                                                |

TP1014♦ Hypothetical protein  
TP1024# Ribosomal protein S9

### Bomp

TP0117 Tpr protein C (TprC)  
TP0126♦ Hypothetical protein  
TP0131 Tpr protein D (TprD)  
TP0234# Ribosomal protein L33  
TP0325 Conserved hypothetical protein  
TP0326 BamA ortholog  
TP0346 Hypothetical protein  
TP0408 Hypothetical protein  
TP0496 Conserved hypothetical protein  
TP0544 Hypothetical protein  
TP0593♦ Hypothetical protein  
TP0620 Tpr protein I (TprI)  
TP0684# Methylgalactoside ABC transporter, periplasmic galactose-binding protein (mgIB-2)  
TP0865 Hypothetical protein  
TP1031 Tpr protein L (TprL)

### Hhomp

TP0011 Tpr protein B (TprB)  
TP0117 Tpr protein C (TprC)  
TP0126♦ Hypothetical protein  
TP0131 Tpr protein D (TprD)  
TP0292 Tpn50  
TP0313 Tpr protein E (TprE)  
TP0317 Tpr protein G (TprG)  
TP0325 Conserved hypothetical protein  
TP0326 BamA ortholog  
TP0388# Cell division protein (ftsQ)



Suppl. Table

|         |                                |
|---------|--------------------------------|
| TP0479♦ | Hypothetical protein           |
| TP0483  | Hypothetical protein           |
| TP0515  | Conserved hypothetical protein |
| TP0548  | Hypothetical protein           |
| TP0610  | Tpr protein H (TprH)           |
| TP0620  | Tpr protein I (TprI)           |
| TP0621  | Tpr protein J (TprJ)           |
| TP0646● | Conserved hypothetical protein |
| TP0697♦ | Hypothetical protein           |
| TP0698  | Hypothetical protein           |
| TP0733  | Hypothetical protein           |
| TP0784● | Hypothetical protein           |
| TP0785  | Conserved hypothetical protein |
| TP0854♦ | Hypothetical protein           |
| TP0856  | Hypothetical protein           |
| TP0858  | Hypothetical protein           |
| TP0859  | Hypothetical protein           |
| TP0860  | Hypothetical protein           |
| TP0865  | Hypothetical protein           |
| TP0897  | Tpr protein K (TprK)           |
| TP0969  | Hypothetical protein           |
| TP1031  | Tpr protein L (TprL)           |

**PredTMDB**

|        |                                |
|--------|--------------------------------|
| TP0011 | Tpr protein B (TprB)           |
| TP0117 | Tpr protein D (TprD)           |
| TP0131 | Tpr protein D (TprD)           |
| TP0313 | Tpr protein E (TprE)           |
| TP0317 | Tpr protein G (TprG)           |
| TP0326 | BamA ortholog                  |
| TP0421 | Conserved hypothetical protein |
| TP0548 | Hypothetical protein           |

Suppl. Table

|         |                                       |
|---------|---------------------------------------|
| TP0620  | Tpr protein I (TprI)                  |
| TP0621  | Tpr protein J (TprJ)                  |
| TP0714# | Flagellar biosynthesis protein (flhA) |
| TP0727# | Flagellar hook protein (flgE)         |
| TP0856  | Hypothetical protein                  |
| TP0858  | Hypothetical protein                  |
| TP0865  | Hypothetical protein                  |
| TP0897  | Tpr protein K (TprK)                  |
| TP0923  | Hypothetical protein                  |
| TP0966  | Hypothetical protein                  |
| TP0969  | Hypothetical protein                  |
| TP1031  | Tpr protein L (TprL)                  |

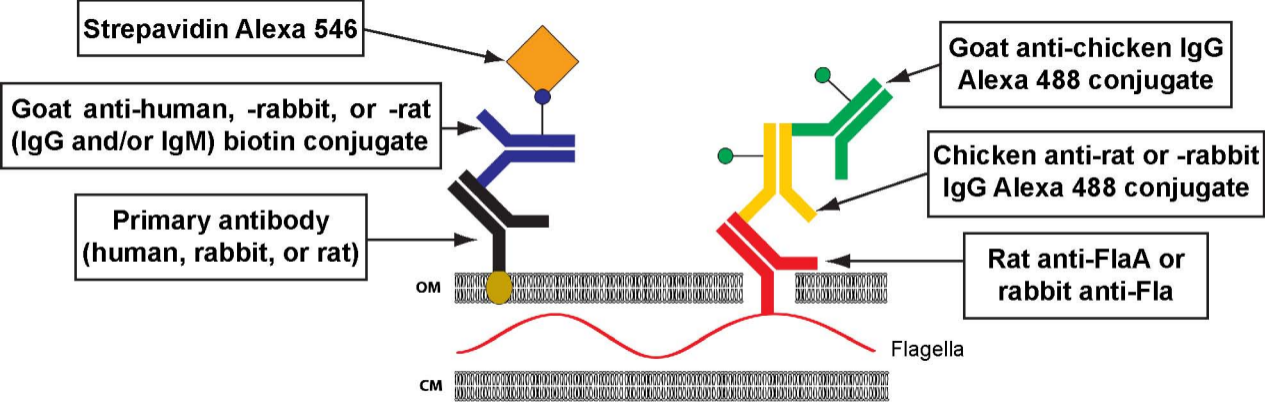

### Group 1

TP0326 (BamA) **MLKKASAFLIASCCVMSLAWAQA**<sup>(S,P,SCF)</sup>ANDNWYEGKPIAISIFEGLEYI

TP0865 (HP) **MVRMRRRRACSSGGACGCAAVRGARSFSLVSVRLGMRIGMSALCLAPLFARTASL**<sup>(P)</sup>**GAWSSQ**

### Group 2

TP0117/0131 & TP0620 (TprC/D & TprI) **MGRQVMQAGVLAGMVCAASGYA**<sup>(S,P,SCF)</sup>**GVLTQPQVSGTAQLQ**

TP0621 (TprJ) **MGCMRWGSLCVVVGASGGV**<sup>(S,P,SCF)</sup>**LQEFSPKLTGSATLEWGISYKG**

TP0969 (HP) **MKVLLRVLLSPWGCAVYRTGGGVVSA**<sup>(SCF)</sup>**G**MKVLVYAVALGFSGCGG

### Group 3

TP0316 (TprF) **VGRQVMQAGVLAGMVCAASGYA**<sup>(S,P,SCF)</sup>**GVLTQPQVSGTAQLQWGIAFQK**

TP1031 (TprL) MWAELRLKDLTVDVFESPRPGQAFTLKKPKASFEATLHCYNAYLTIGKD

### Group 4

TP0009 (TprA) VVKTRYTTVCMRLVLGSCIFILLRGRATVSRHLHASPAVTISGSTRLTWGINLGAK

TP0011 (TprB) **MGACISVYARFALG**<sup>(SCF)</sup>**CGVFFLHGA**<sup>(S)</sup>**VLDGVSRAFFSSAAF**

TP0155 (CHP) **MSVYCRSSKQTVREPCRPVPVGALLFVTL**<sup>(S,P,SCF)</sup>**LLLLALALAYFGA**<sup>(SCF)</sup>**QVPELTPALTTEQEP**<sup>(P)</sup>**PRQ**

TP0313 (TprE) **MGCMRWGSLCVVVGASGGV**<sup>(S,P,SCF)</sup>**LQEFSPKLTGSATLEWGISYKGVGSH**

TP0325 (CHP) **MAFESVNVGALYQMVA**<sup>(S)</sup>**ACTSPQGA**<sup>(SCF)</sup>**STLVRALVPLQSTA**<sup>(S,P,SCF)</sup>**DFYVSSDFRDISYNCV**

TP0421 (CHP) **MRGGWCLSR**<sup>(S,P,SCF)</sup>**SVGCAGALLLFAVGA**<sup>(S,P,SCF)</sup>**QEHAPPVVRDTALAGEFRRGVLA**<sup>(S,P,SCF)</sup>**YR**

TP0548 (HP) **MRQNGAVPMISCSVRRRPRWEPQVGA**<sup>(P,SCF)</sup>**AFLAFALLP**<sup>(P,SCF)</sup>**VLSGRGMQAAVATAAG**

TP0729 (HP) **MELRGLLARAIGIGVAESAPAA**<sup>(S,P)</sup>**QETISVGTSCAAAPCSFA**<sup>(SCF)</sup>**QSLHDHMRGA**

TP0855 (HP) **MRIHQRSAPCVVLLFLPSAPLCA**<sup>(S,P,SCF)</sup>**ARGSKDWTTPPQLGEVIESTEQLAE**

TP0858 (HP) **MLRLPTARACITMGTMIRHTFTHRC**<sup>(P)</sup>**GALLCALALGSSTMA**<sup>(SCF)</sup>**AATAAAKPKKGQMQK**

TP0897 (TprK) **VVYQRVGHRRFSLIFFVVVLGRSPRLWA**<sup>(S)</sup>**QV**<sup>(S)</sup>**FSFTPDIEGYAELAWGIA**<sup>(S)</sup>**XEBGXA**
